# Supplementary material
Source: publisher site journal article supplement (https://www.dovepress.com/article/425479)

# Supplementary Figure 1

| Patient 1 | Eye | Preop Rx             | PRFI  |
|-----------|-----|----------------------|-------|
| 21 yo     | OD* | -5.25/-0.25x180      | 0.012 |
|           | OS  | No surgery performed |       |

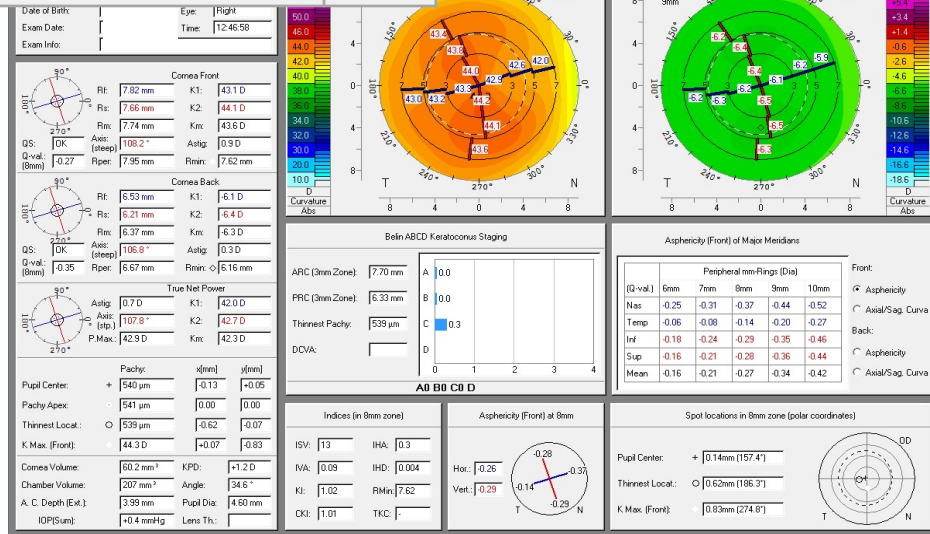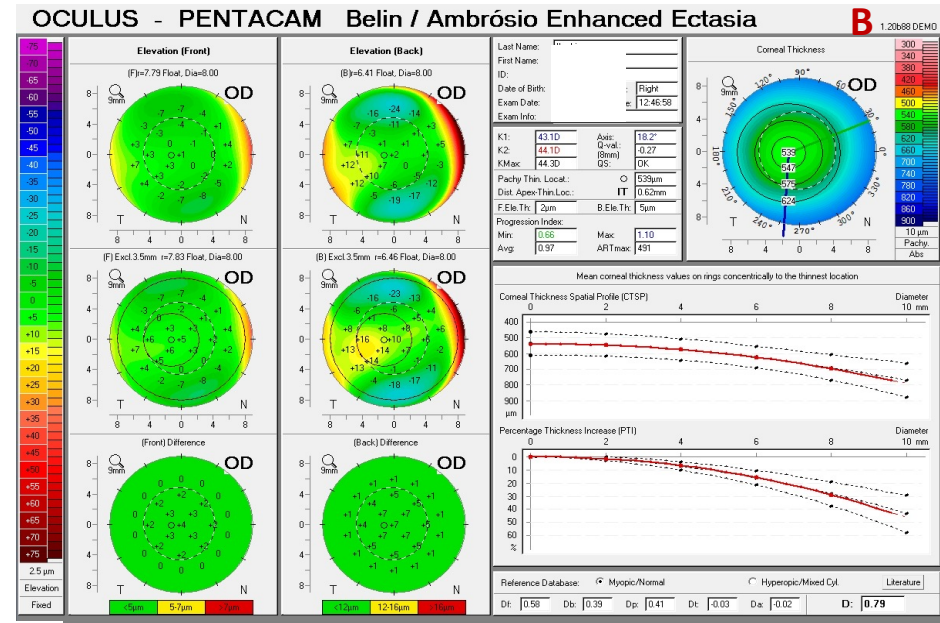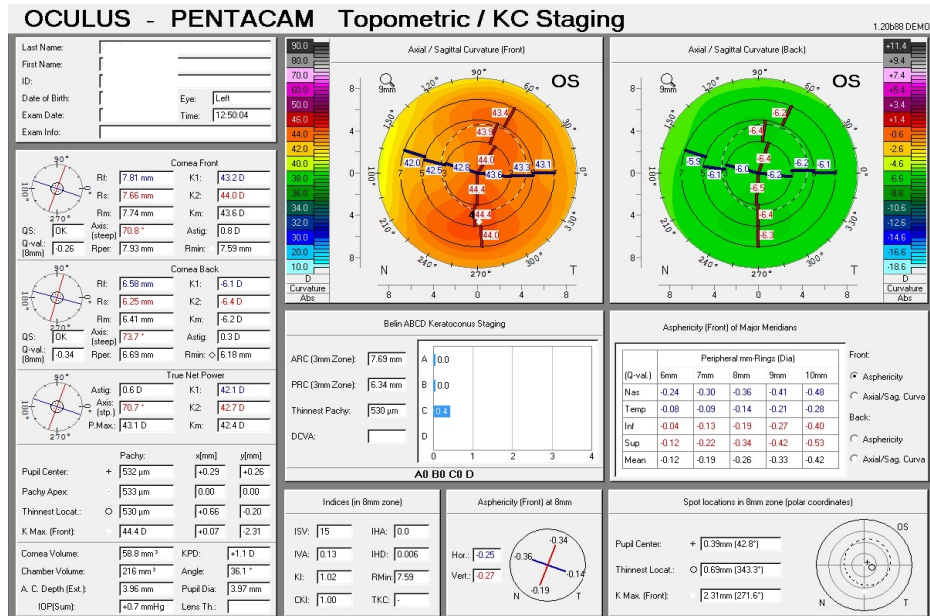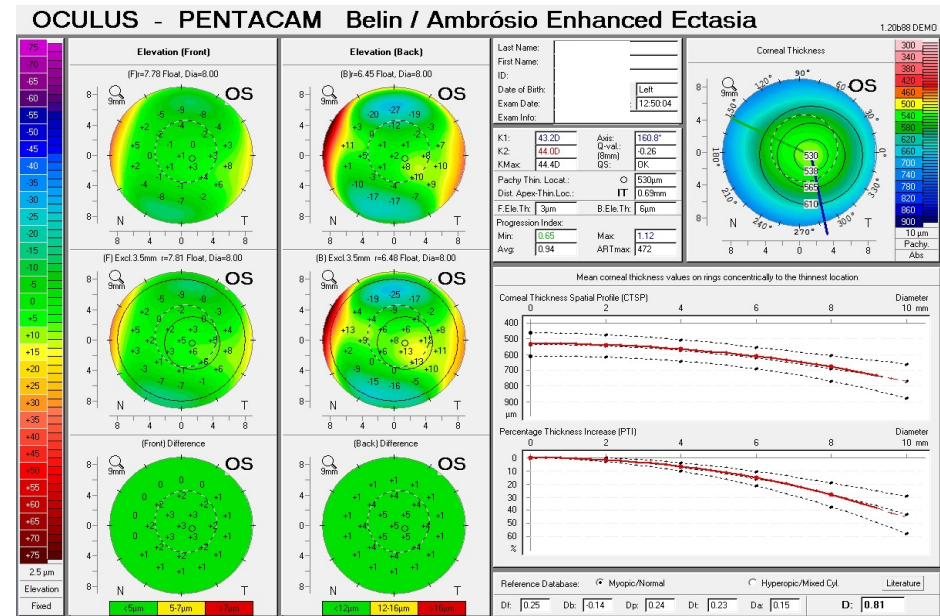

Patient's age, eye laterality, preoperative refraction, Pentacam Random Forest Index (PRFI) A. Pentacam topometric display of both eyes (OU). B. The Pentacam Belin / Ambrósio Enhanced Ectasia of OU. \* Eye that develops ectasia after LASIK.

# Supplementary Figure 2

| Patient 2 | Eye | Preop Rx       | PRFI |
|-----------|-----|----------------|------|
| 40 yo     | OD* | -3.75/-1.00x75 | 0.54 |
|           | OS  | -1.00/-0.75x13 | 0.14 |

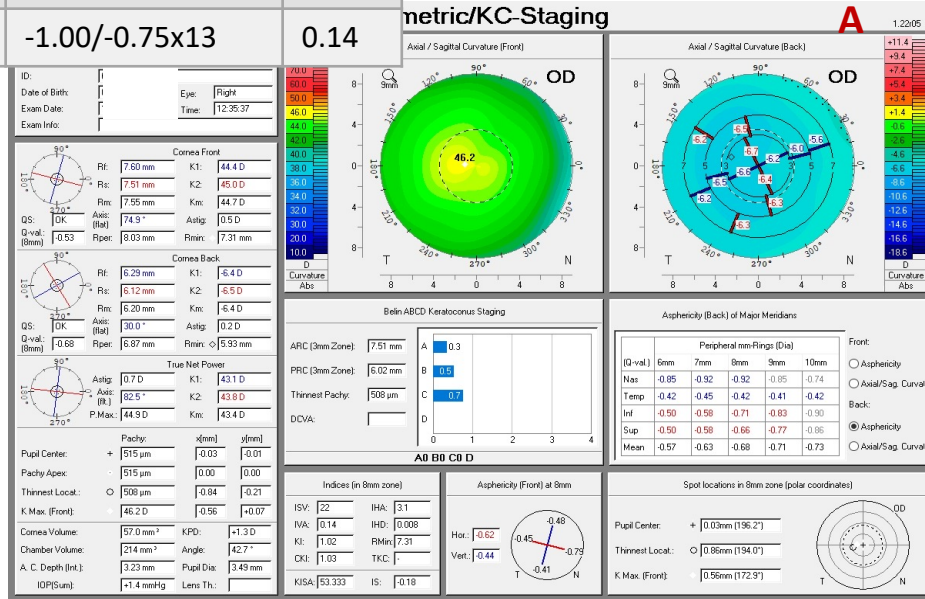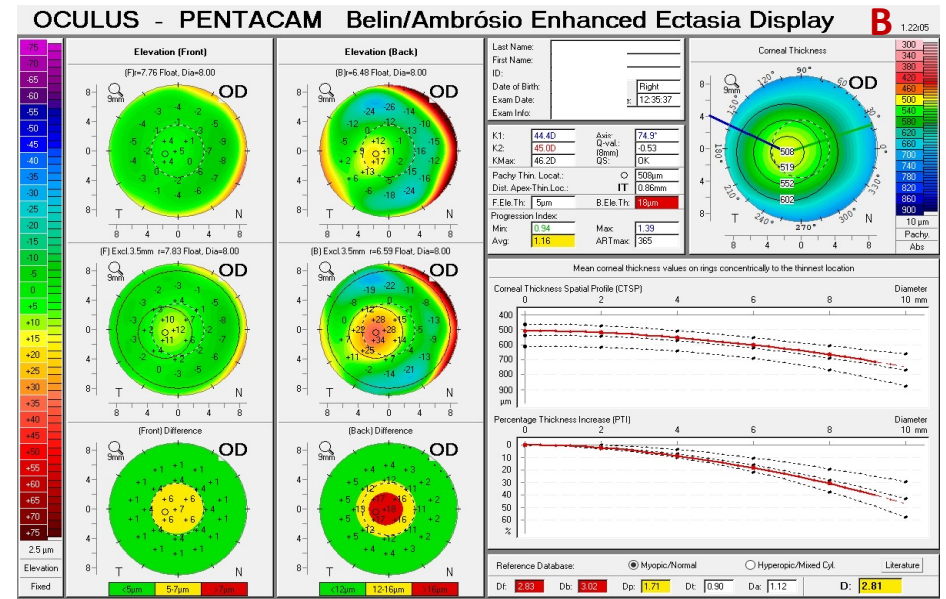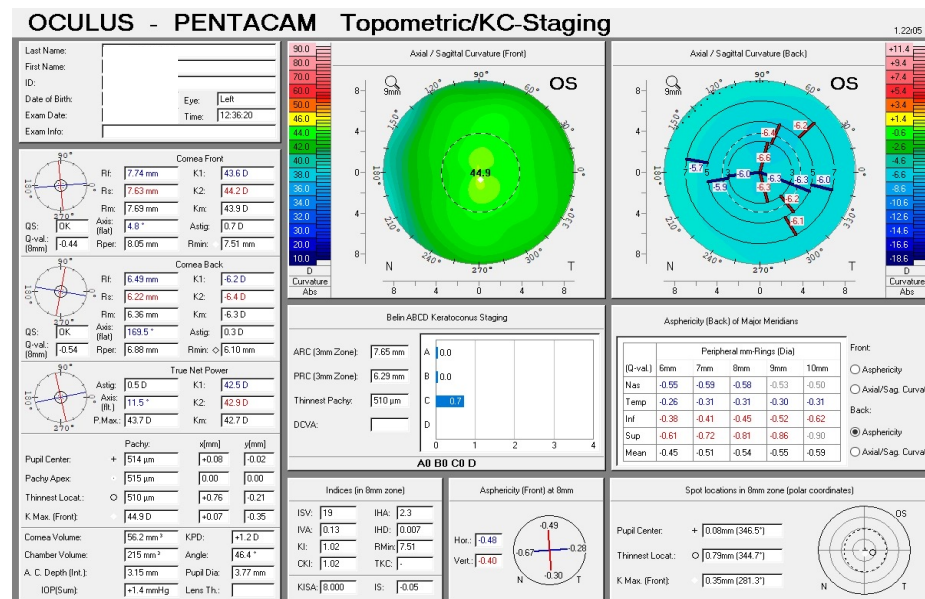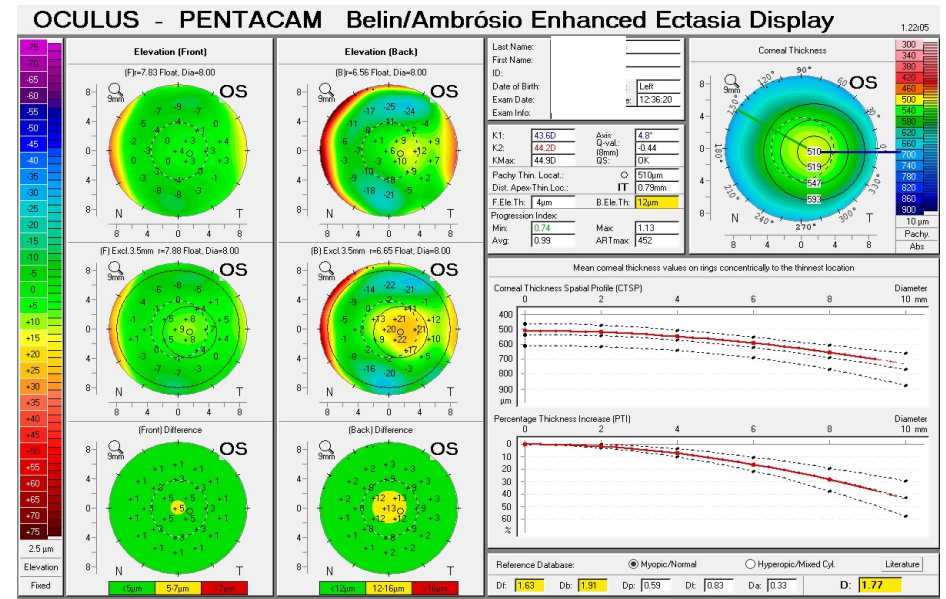

Patient's age, eye laterality, preoperative refraction, Pentacam Random Forest Index (PRFI) A. Pentacam topometric display of both eyes (OU). B. The Pentacam Belin / Ambrósio Enhanced Ectasia of OU. \* Eye that develops ectasia after LASIK.

# Supplementary Figure 3

| Patient 3 | Eye | Preop Rx        | PRFI |
|-----------|-----|-----------------|------|
| 21 yo     | OD* | -3.00/-0.50x5   | 0.48 |
|           | OS* | -3.25/-0.25x150 | 0.3  |

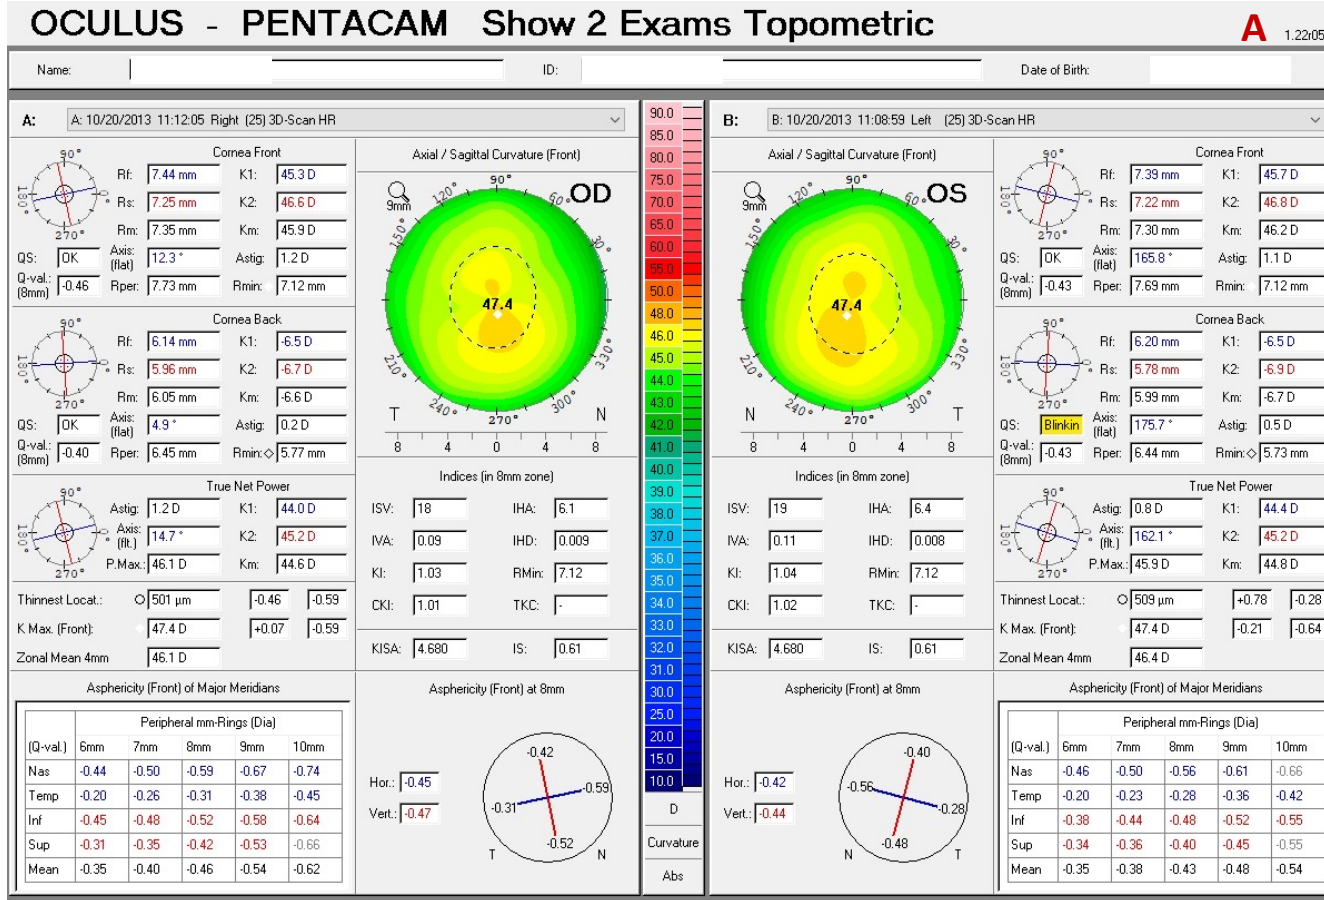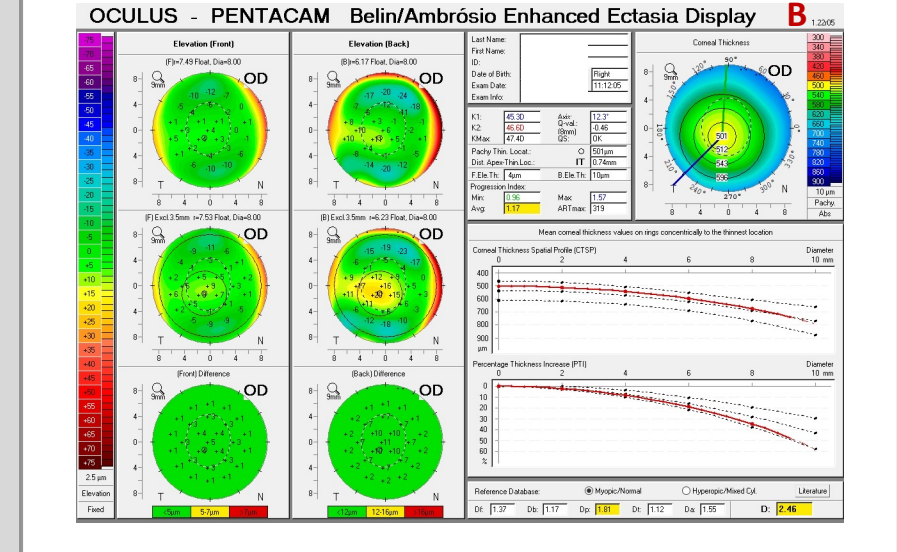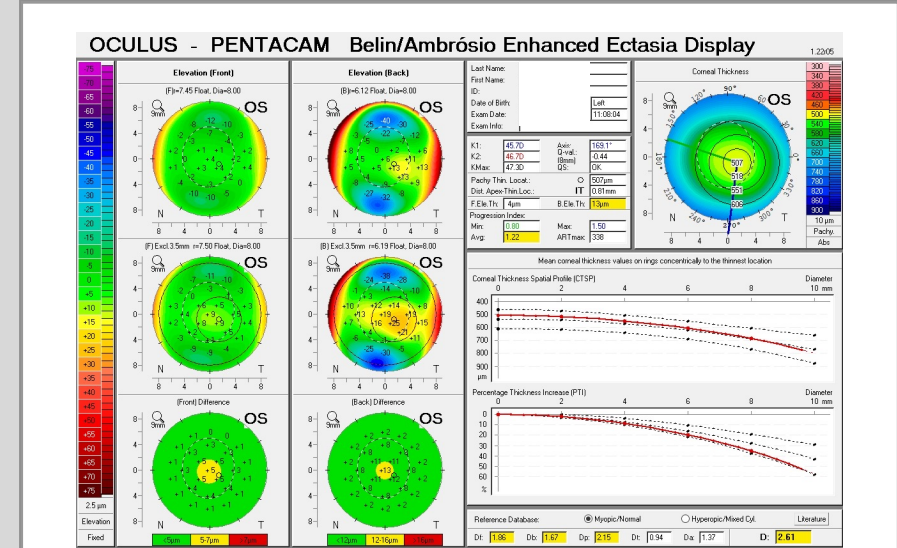

Patient's age, eye laterality, preoperative refraction, Pentacam Random Forest Index (PRFI) A. Pentacam topometric display of both eyes (OU). B. The Pentacam Belin / Ambrósio Enhanced Ectasia of OU. \* Eye that develops ectasia after LASIK.

# Supplementary Figure 4

| Patient 4 | Eye | Preop Rx        | PRFI  |
|-----------|-----|-----------------|-------|
| 24 yo     | OD* | -4.25/-2.00x30  | 0.578 |
|           | OS* | -4.25/-2.25x155 | 0.762 |

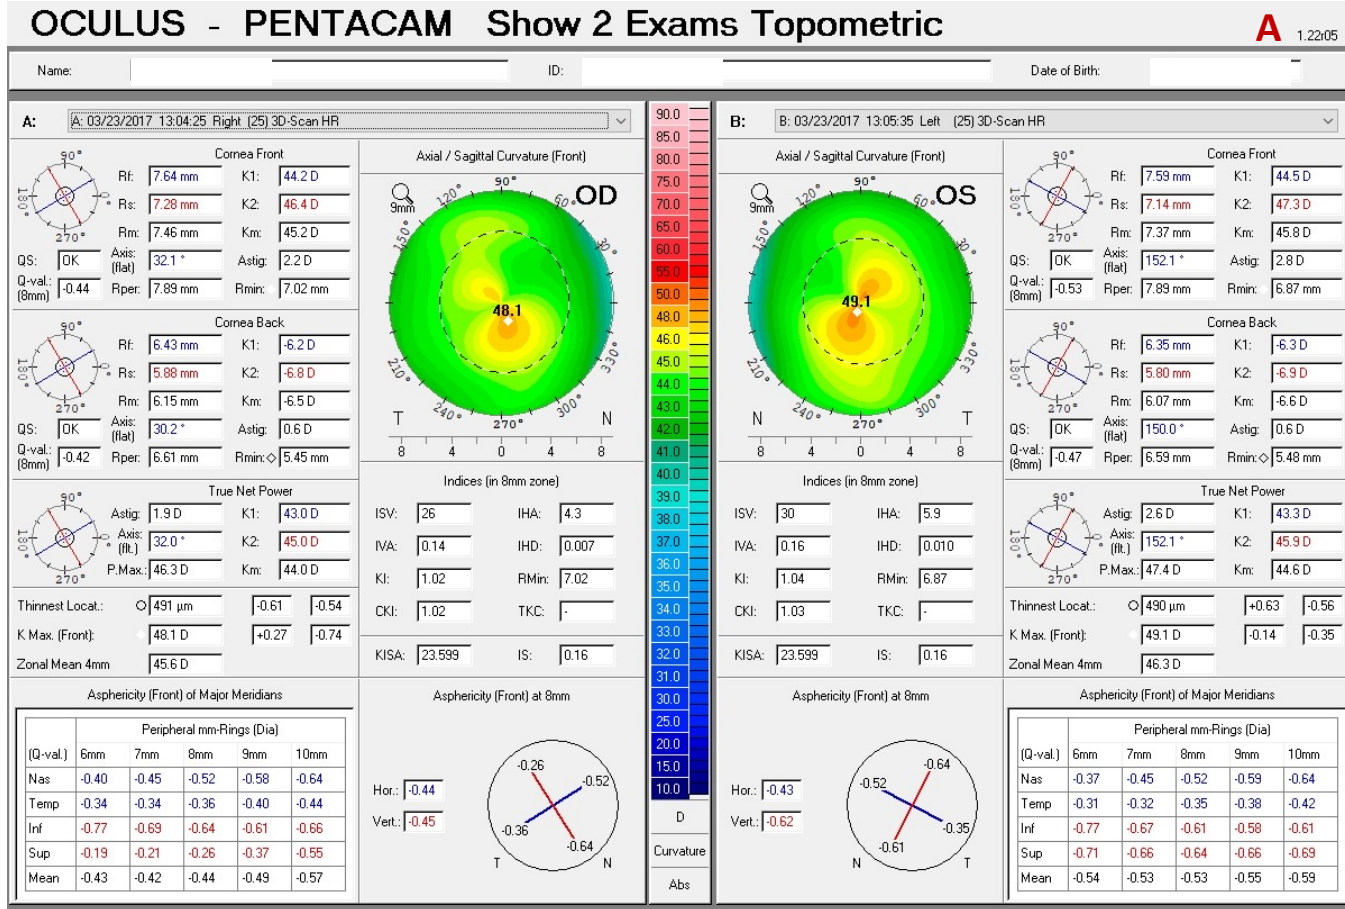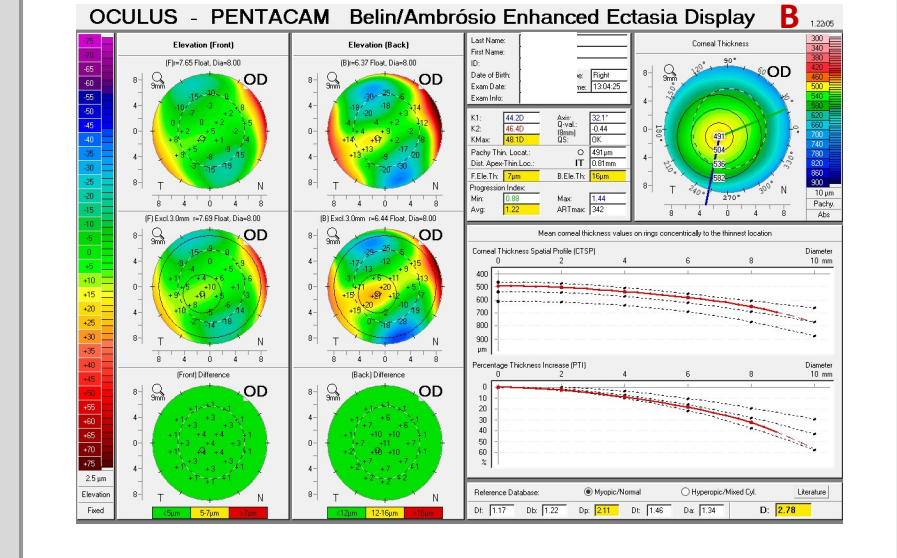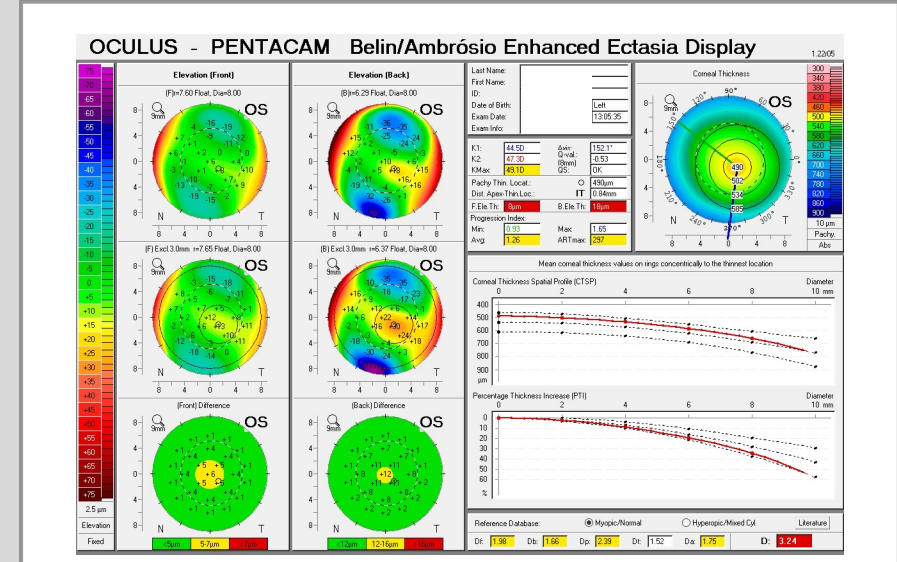

Patient's age, eye laterality, preoperative refraction, Pentacam Random Forest Index (PRFI) A. Pentacam topometric display of both eyes (OU). B. The Pentacam Belin / Ambrósio Enhanced Ectasia of OU. \* Eye that develops ectasia after LASIK.

# Supplementary Figure 5

| Patient 5 | Eye | Preop Rx        | PRFI  |
|-----------|-----|-----------------|-------|
| 34 yo     | OD* | -4.75/-1.75x180 | 0.554 |
|           | OS  | -2.75/-1.50x148 | 0.044 |

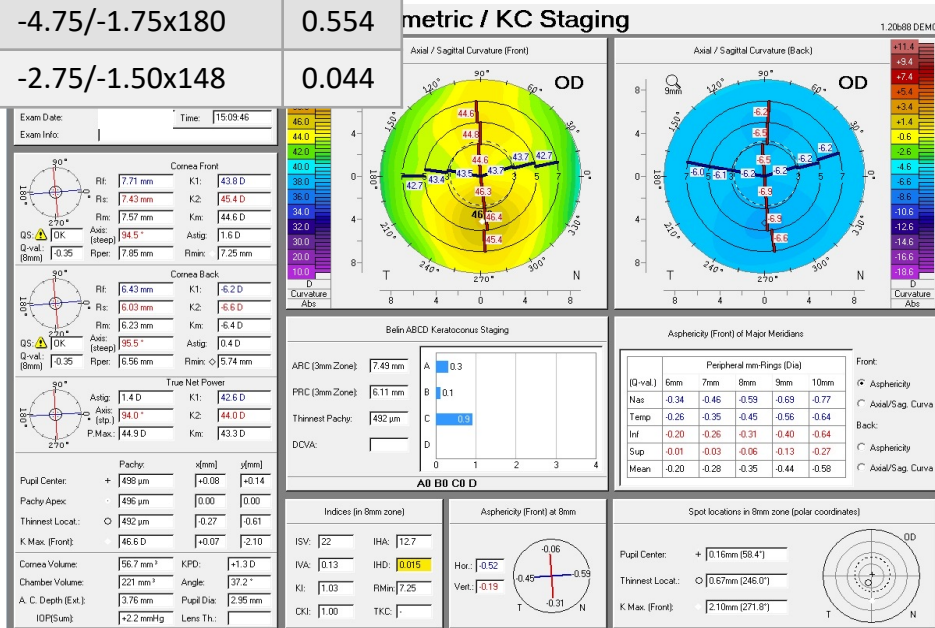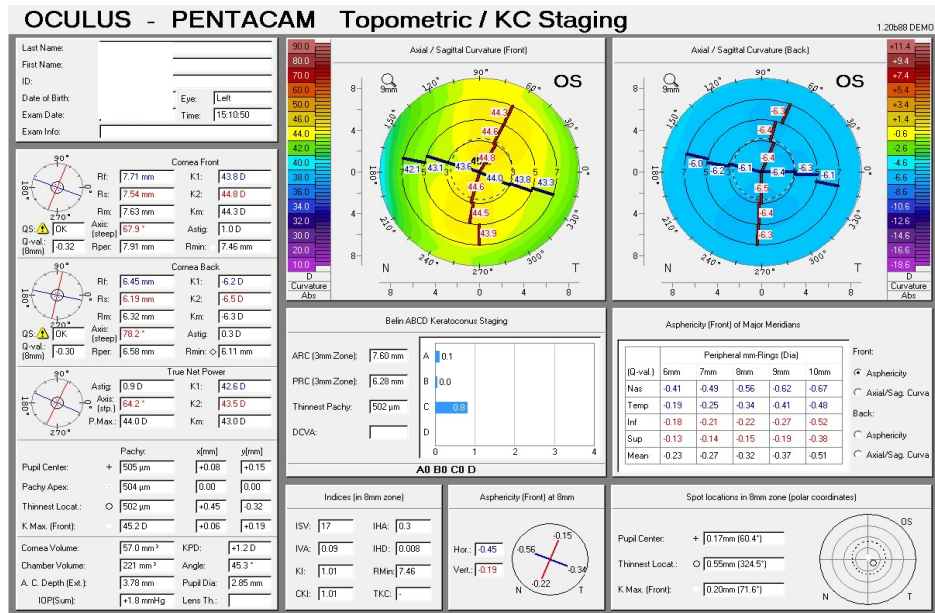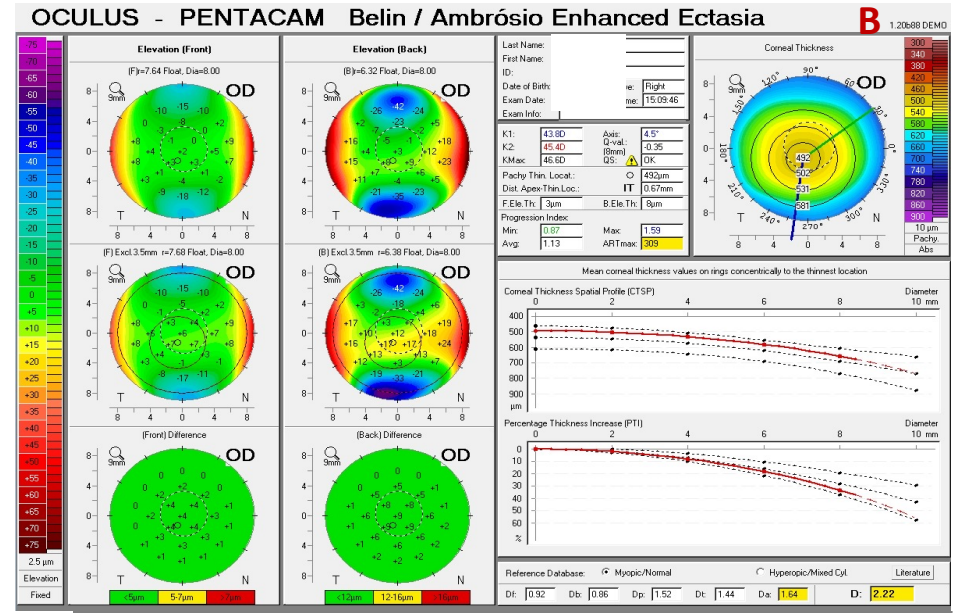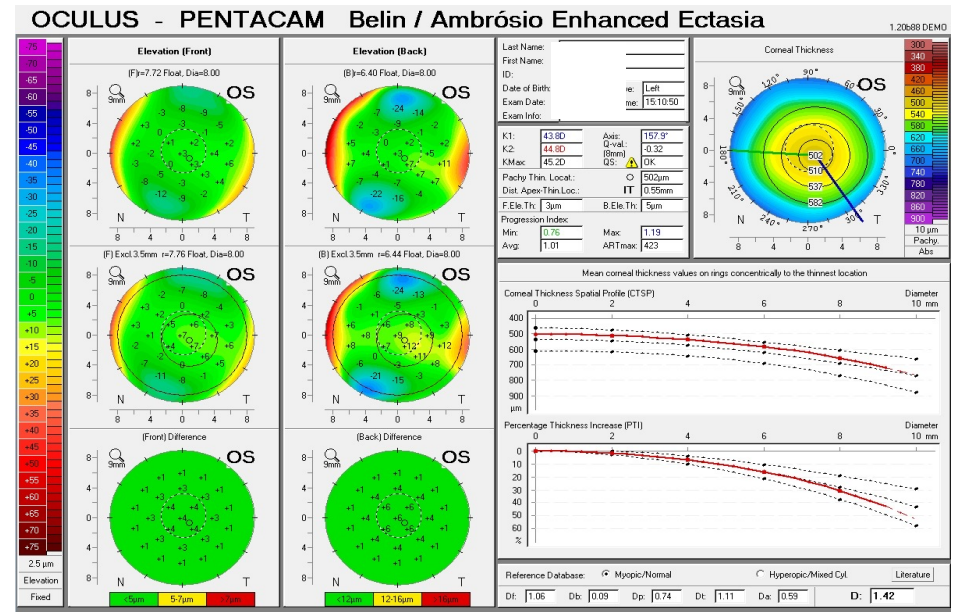

Patient's age, eye laterality, preoperative refraction, Pentacam Random Forest Index (PRFI) A. Pentacam topometric display of both eyes (OU). B. The Pentacam Belin / Ambrósio Enhanced Ectasia of OU. \* Eye that develops ectasia after LASIK.

|                  |            |                 |             |
|------------------|------------|-----------------|-------------|
| <b>Patient 6</b> | <b>Eye</b> | <b>Preop Rx</b> | <b>PRFI</b> |
| 35 yo            | OD         | -6.00/-1.25x95  | 0.346       |
|                  | OS*        | -0.25/-2.75x70  | 0.226       |

# Supplementary Figure 6

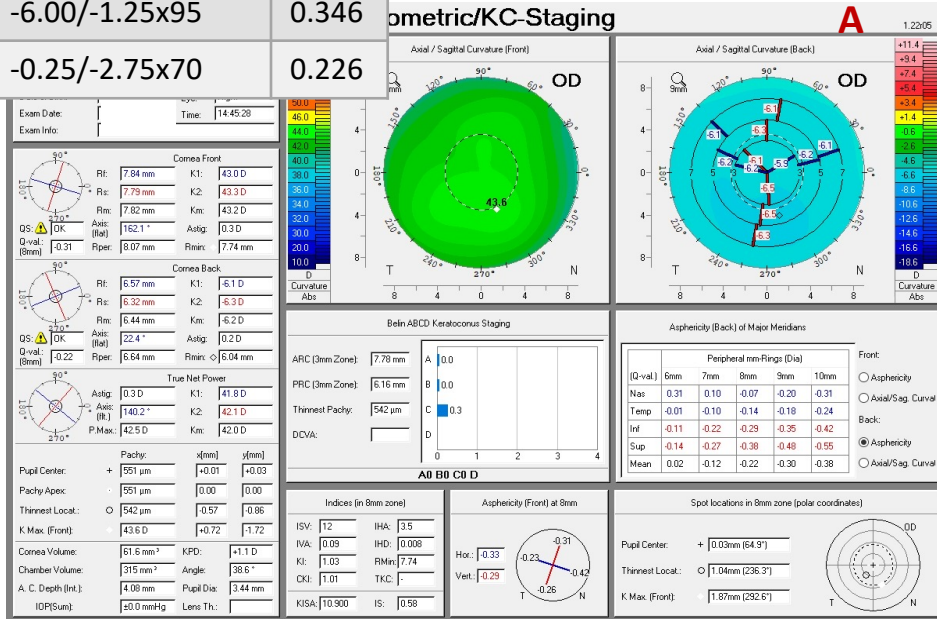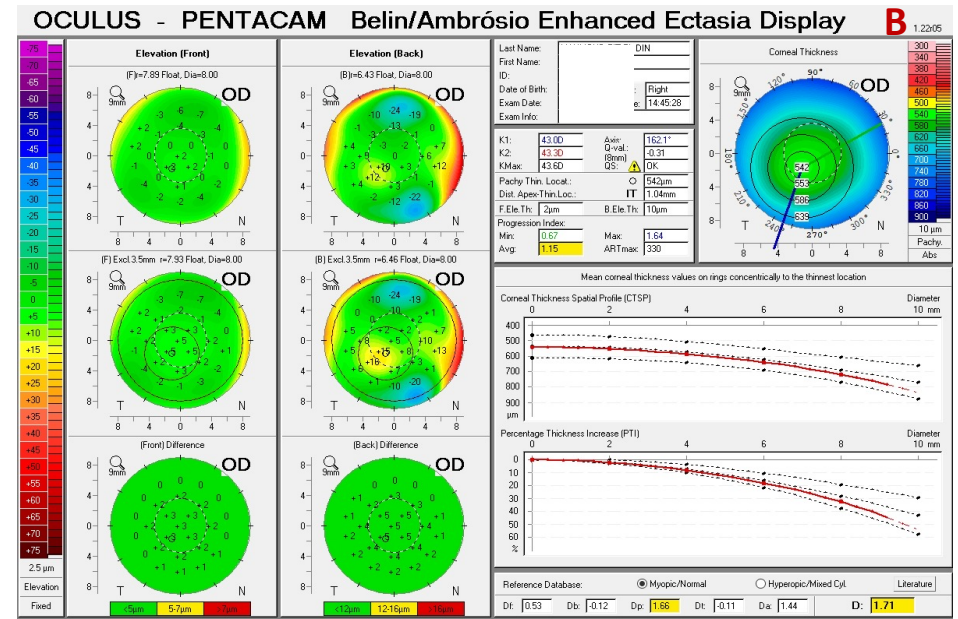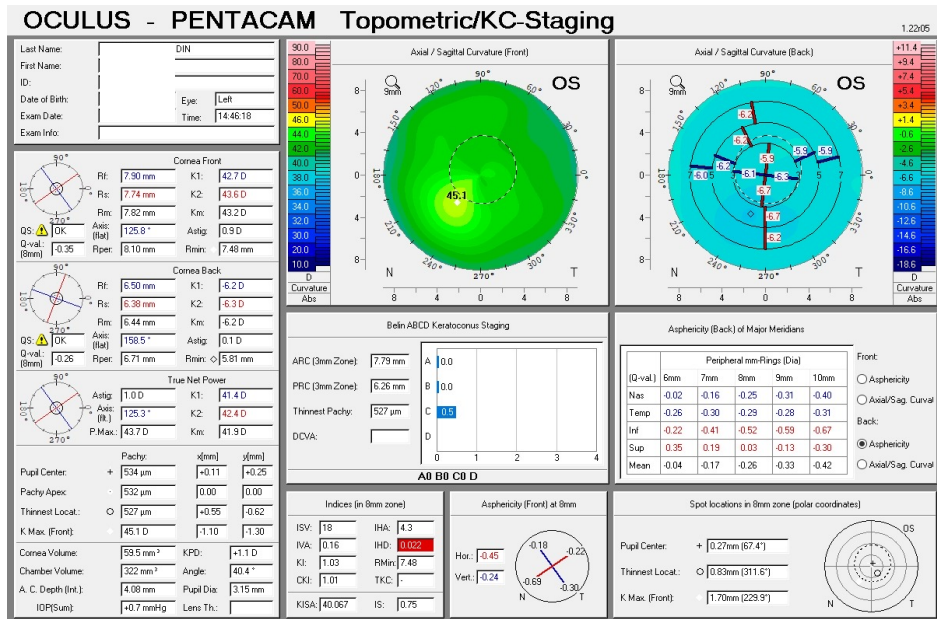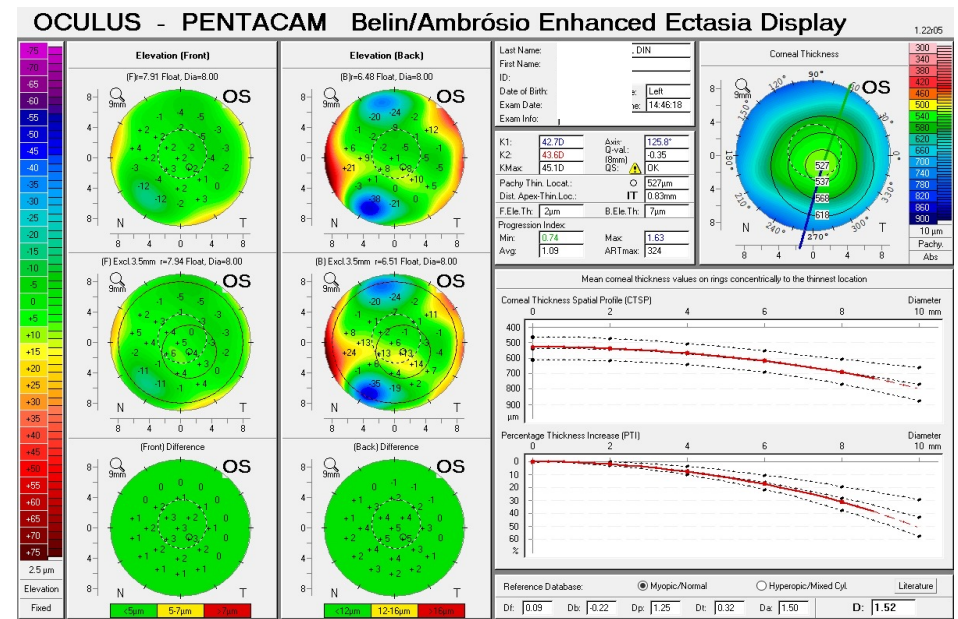

Patient's age, eye laterality, preoperative refraction, Pentacam Random Forest Index (PRFI) A. Pentacam topometric display of both eyes (OU). B. The Pentacam Belin / Ambrósio Enhanced Ectasia of OU. \* Eye that develops ectasia after LASIK.

# Supplementary Figure 7

| Patient 7 | Eye | Preop Rx        | PRFI  |
|-----------|-----|-----------------|-------|
| 24 yo     | OD* | -4.00/-0.50x115 | 0.236 |
|           | OS* | -4.00/-0.50x175 | 0.198 |

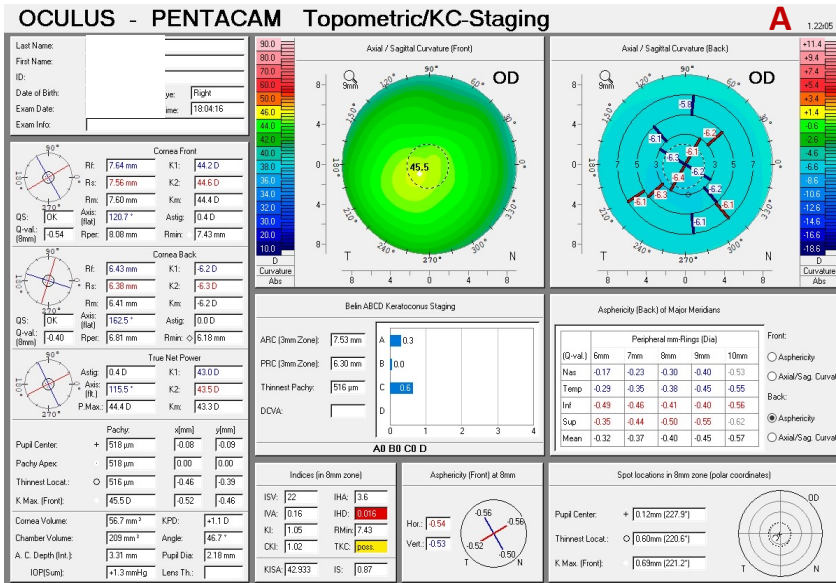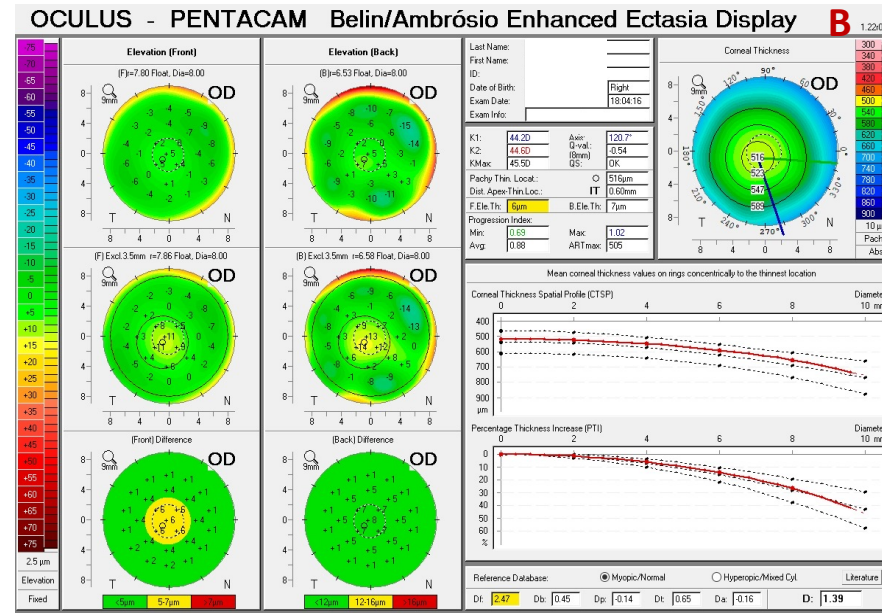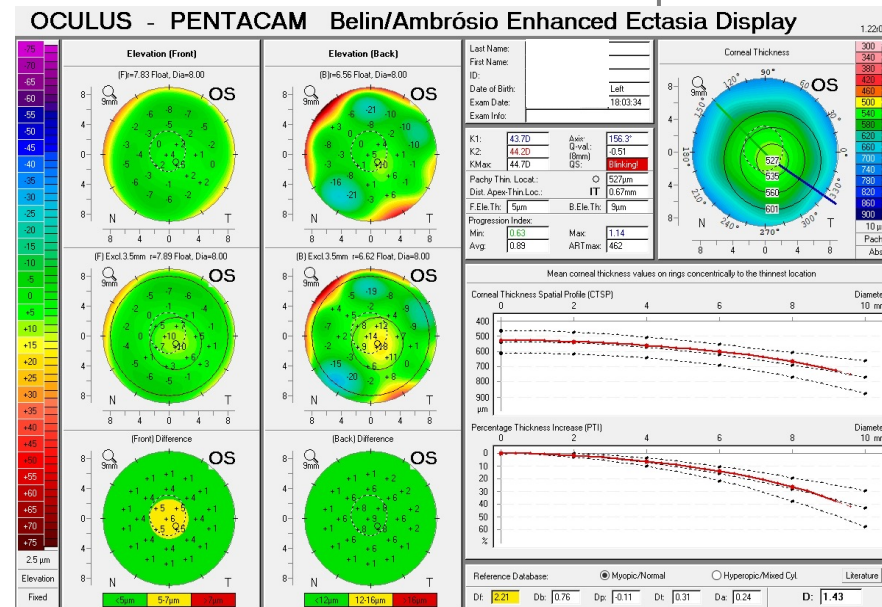

Patient's age, eye laterality, preoperative refraction, Pentacam Random Forest Index (PRFI) A. Pentacam topometric display of Right eye (OD). B. The Pentacam Belin / Ambrósio Enhanced Ectasia of OU. \* Eye that develops ectasia after LASIK.

# Supplementary Figure 8

| Patient 8 | Eye | Preop Rx       | PRFI  |
|-----------|-----|----------------|-------|
| 24 yo     | OD  | -4.25          | 0.19  |
|           | OS* | -2.25/-2.50x80 | 0.098 |

## OCULUS - PENTACAM Show 2 Exams Topometric

A 1.22.05

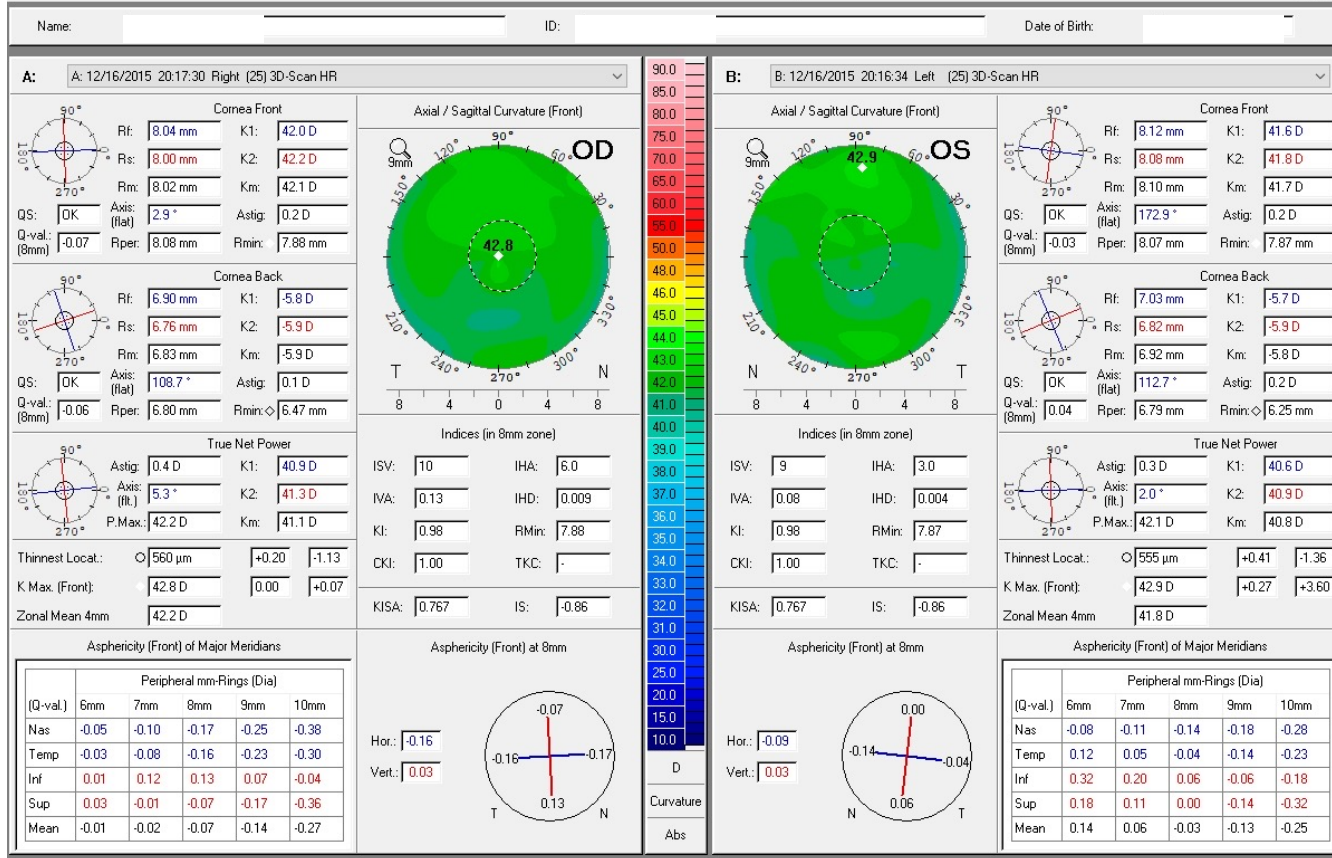



# Supplementary Figure 9

| Patient 9 | Eye | Preop Rx             | PRFI  |
|-----------|-----|----------------------|-------|
| 25 yo     | OD* | -3.50/-0.75x30       | 0.034 |
|           | OS  | No surgery performed |       |

## OCULUS - PENTACAM Show 2 Exams Topometric

A 1.2205

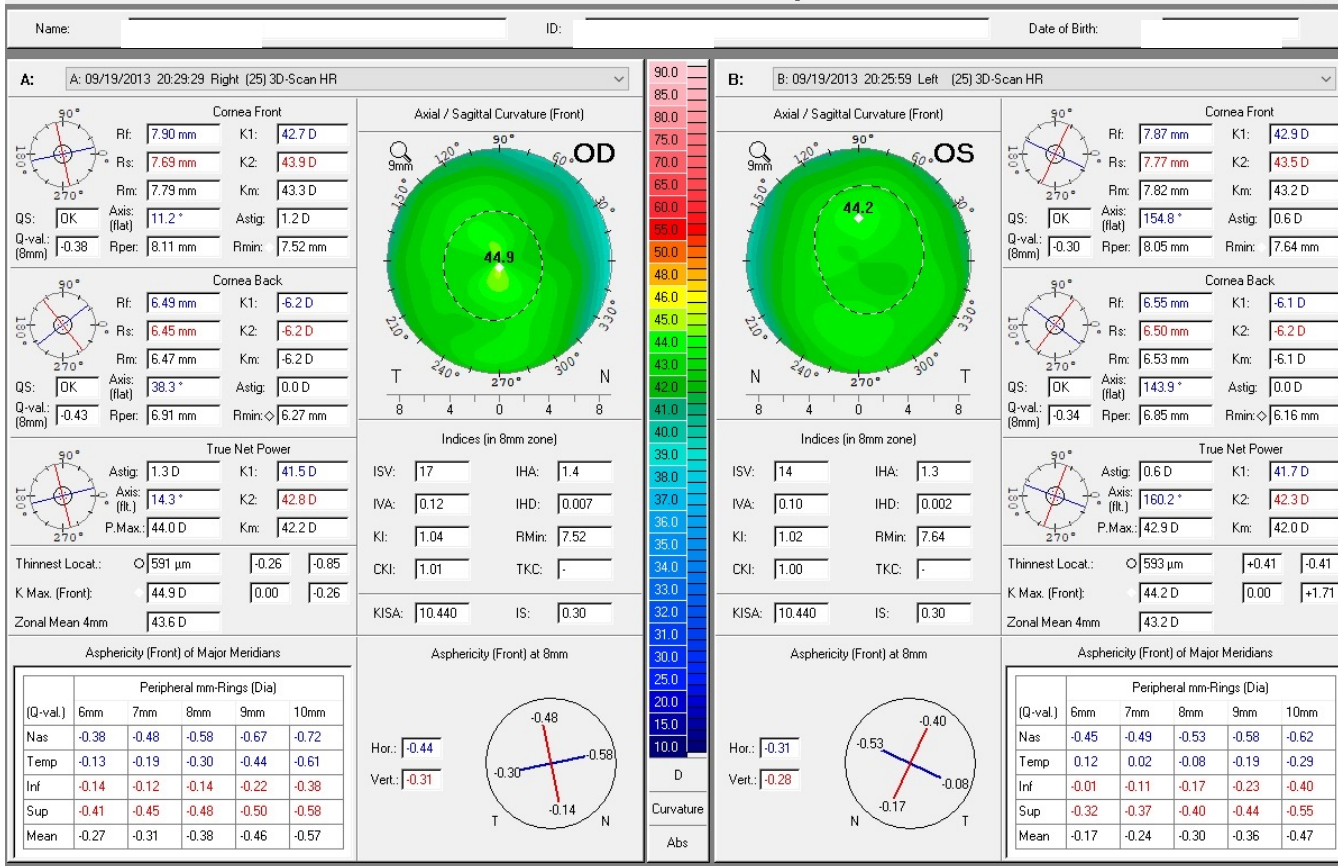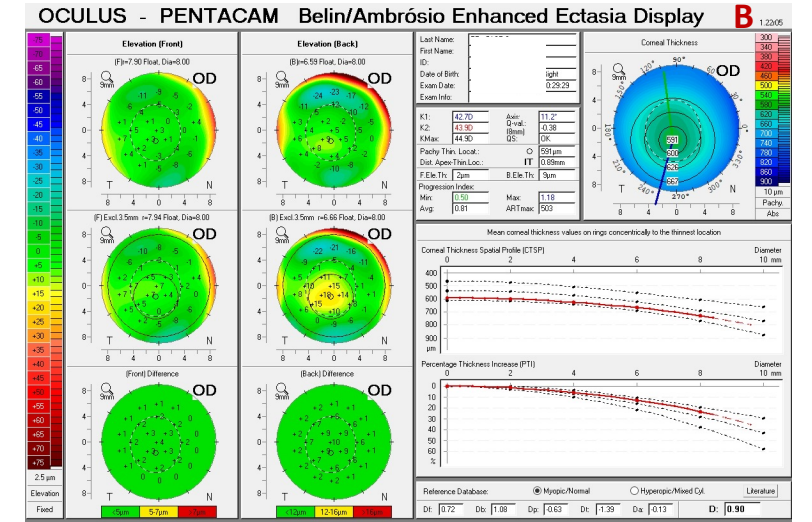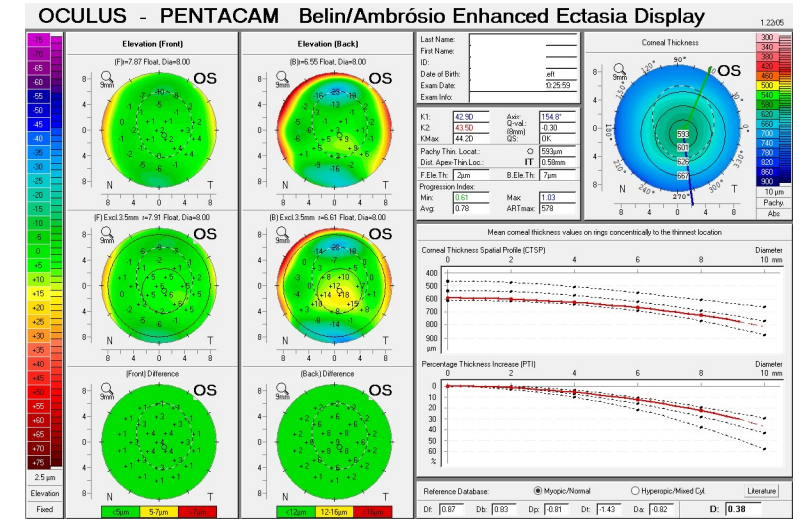

Patient's age, eye laterality, preoperative refraction, Pentacam Random Forest Index (PRFI) A. Pentacam topometric display of both eyes (OU). B. The Pentacam Belin / Ambrósio Enhanced Ectasia of OU. \* Eye that develops ectasia after LASIK.

# Supplementary Figure 10

| Patient 10 | Eye | Preop Rx        | PRFI |
|------------|-----|-----------------|------|
| 21 yo      | OD* | -1.00/-1.00x150 | 0.13 |
|            | OS* | -1.50/-1.00x160 | 0.72 |

## OCULUS - PENTACAM Show 2 Exams Topometric

A 1.22.05

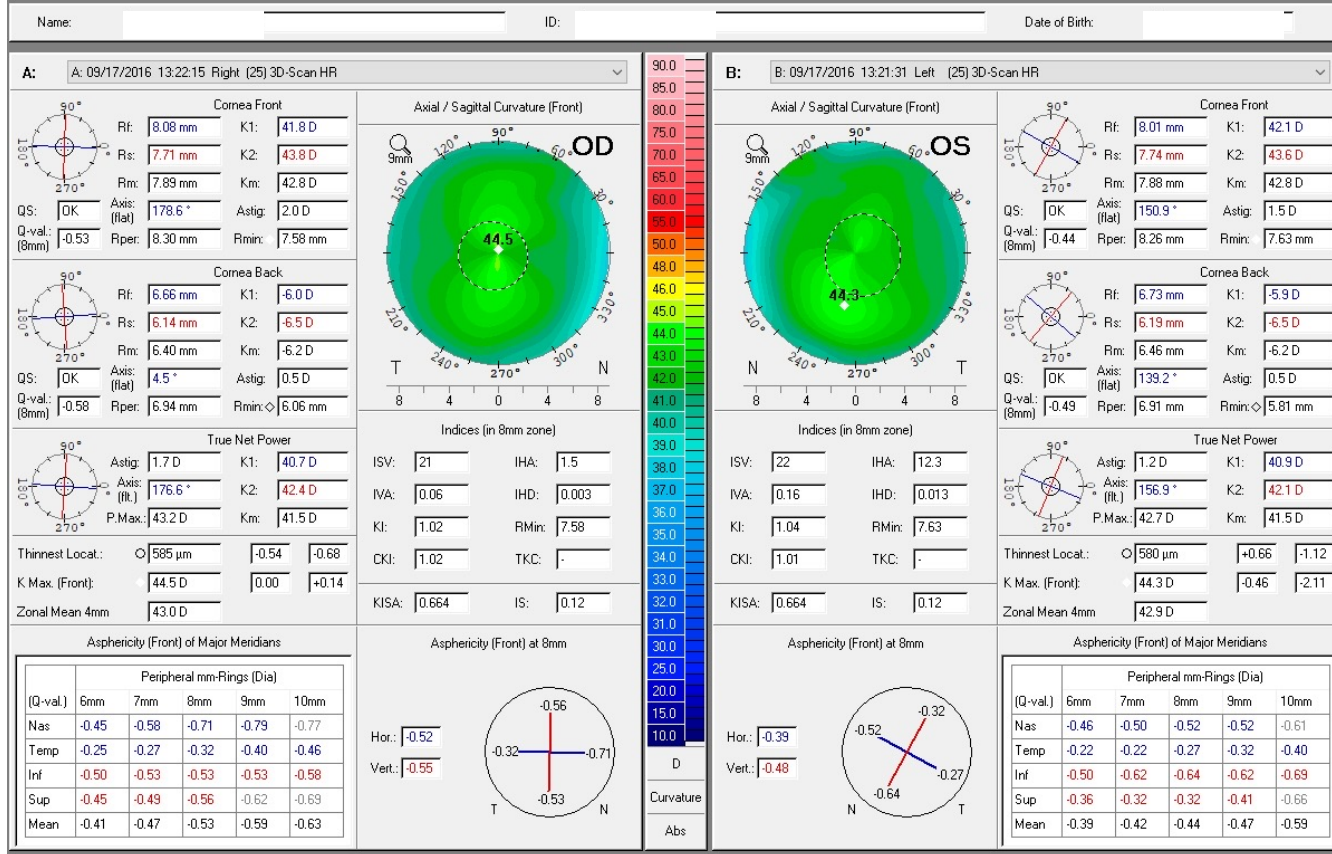

# Supplementary Figure 11

| Patient 11 | Eye | Preop Rx       | PRFI  |
|------------|-----|----------------|-------|
| 24 yo      | OD* | -1.75/-1.00x35 | 0.562 |
|            | OS* | -3.25/-1.00x30 | 0.838 |

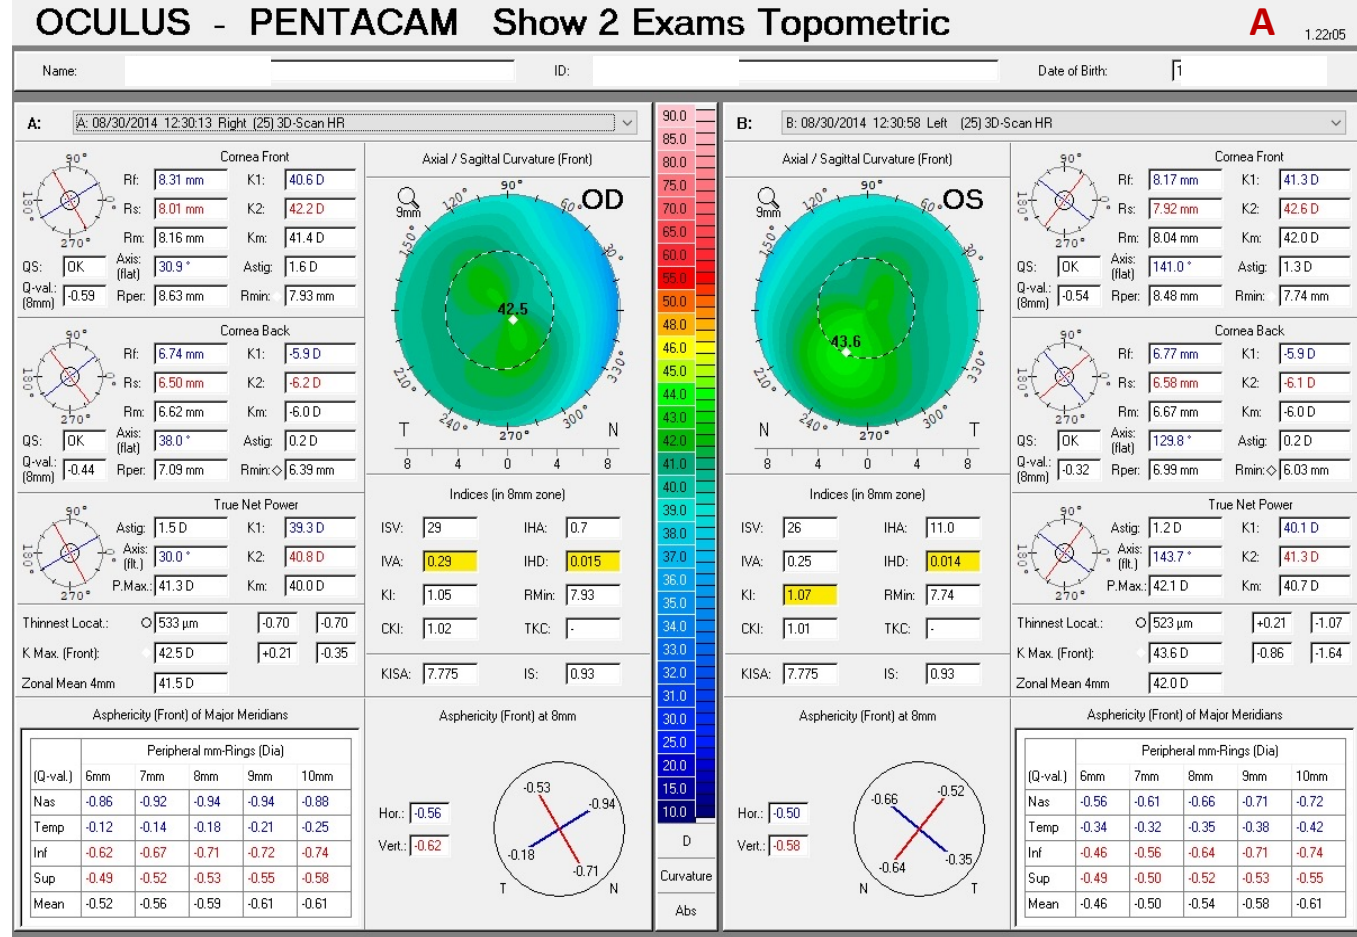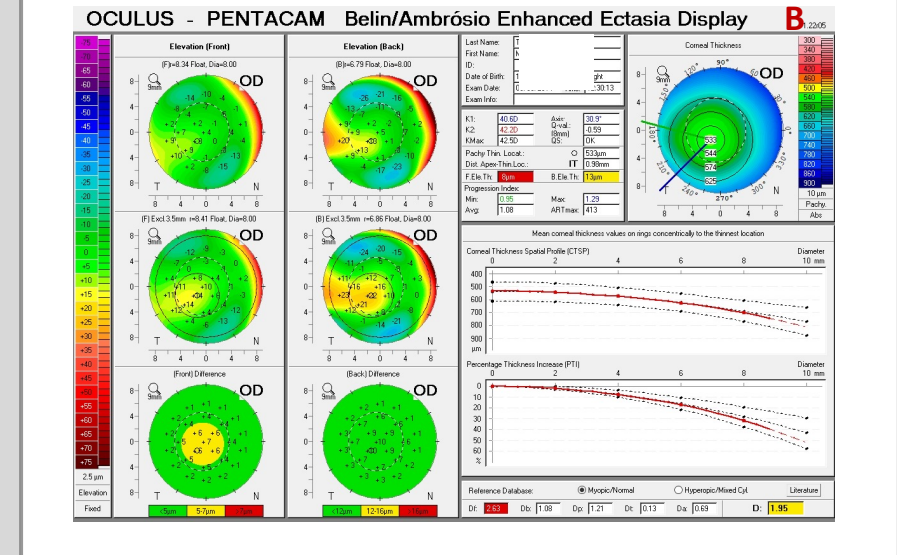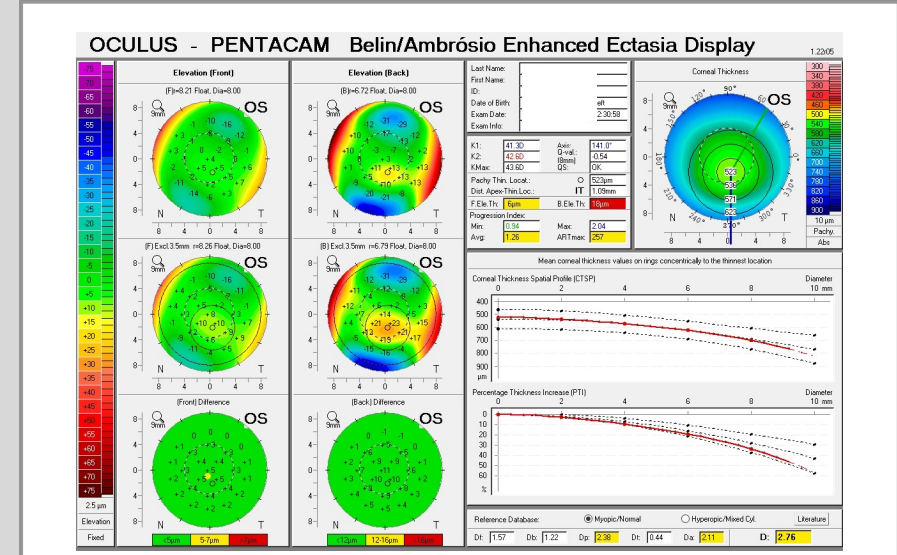

Patient's age, eye laterality, preoperative refraction, Pentacam Random Forest Index (PRFI) A. Pentacam topometric display of both eyes (OU). B. The Pentacam Belin / Ambrósio Enhanced Ectasia of OU. \* Eye that develops ectasia after LASIK.

# Supplementary Figure 12

| Patient 12 | Eye | Preop Rx        | PRFI  |
|------------|-----|-----------------|-------|
| 28 yo      | OD* | -2.50/-1.00x170 | 0.09  |
|            | OS* | -2.50/-1.00x15  | 0.256 |

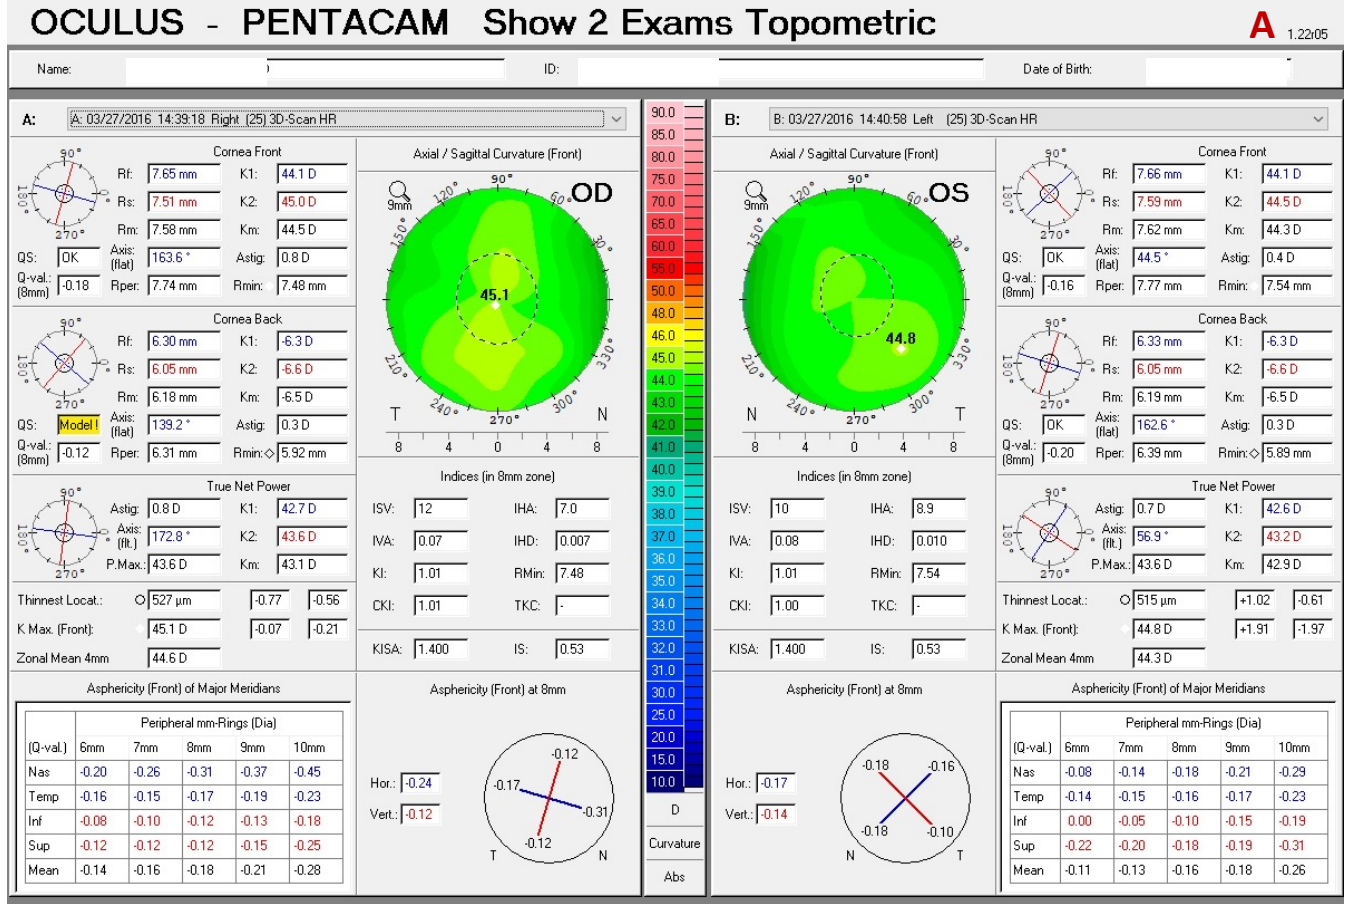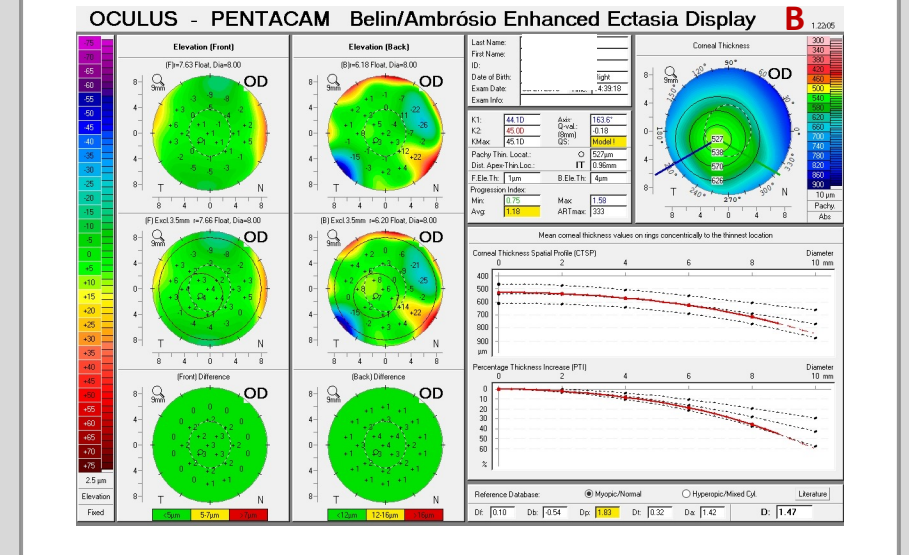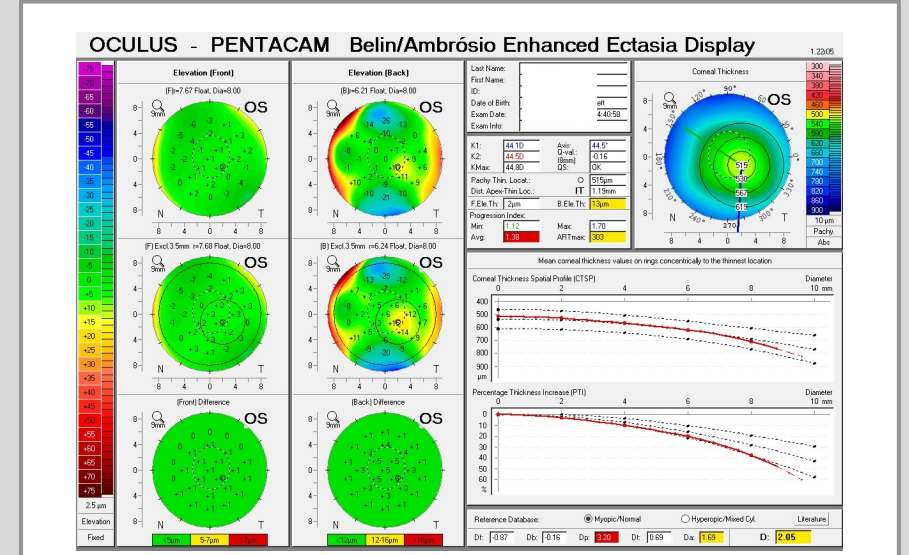

Patient's age, eye laterality, preoperative refraction, Pentacam Random Forest Index (PRFI) A. Pentacam topometric display of both eyes (OU). B. The Pentacam Belin / Ambrósio Enhanced Ectasia of OU. \* Eye that develops ectasia after LASIK.

# Supplementary Figure 13

| Patient 13 | Eye | Preop Rx        | PRFI  |
|------------|-----|-----------------|-------|
| 24 yo      | OD* | -1.00/-0.75x110 | 0.924 |
|            | OS* | -1.00/-1.50x160 | 0.966 |

## OCULUS - PENTACAM Show 2 Exams Topometric

A 1.2205

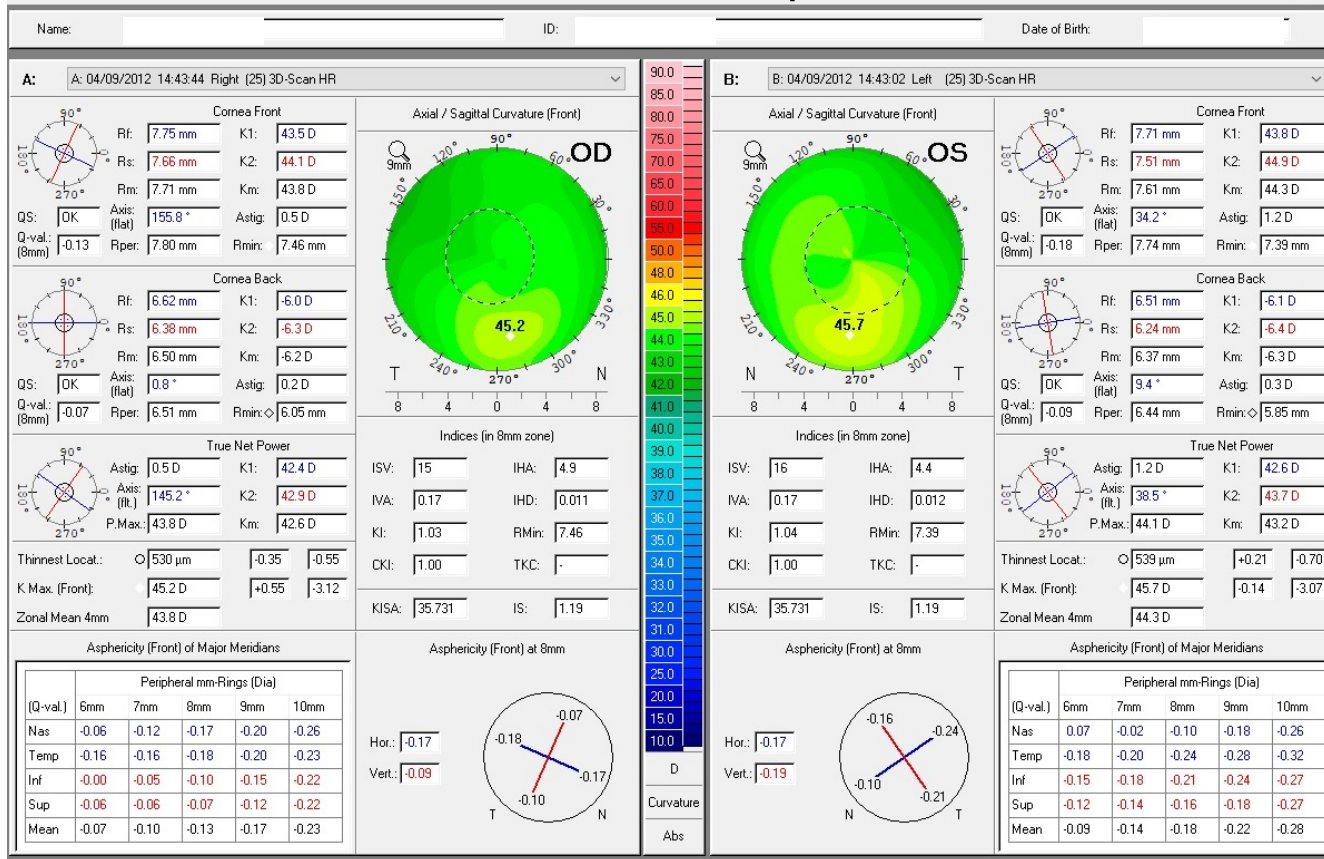

# Supplementary Figure 14

| Patient 14 | Eye | Preop Rx        | PRFI  |
|------------|-----|-----------------|-------|
| 23 yo      | OD* | -3.00/-1.50x60  | 0.366 |
|            | OS* | -2.50/-2.00x100 | 0.262 |

## OCULUS - PENTACAM Show 2 Exams Topometric

A 1.2205

Name: \_\_\_\_\_ ID: \_\_\_\_\_ Date of Birth: \_\_\_\_\_

**A:** A: 02/27/2013 11:29:54 Right (25) 3D-Scan HR

**Cornea Front**

Rf: 7.69 mm K1: 43.9 D  
 Rs: 7.51 mm K2: 44.9 D  
 Rm: 7.60 mm Km: 44.4 D  
 Q-val: [OK] Axis: [66.9°] Astig: [1.0 D]  
 Q-val: [-0.37] Rper: 7.88 mm Rmin: 7.48 mm

**Cornea Back**

Rf: 6.53 mm K1: -6.1 D  
 Rs: 6.30 mm K2: -6.3 D  
 Rm: 6.42 mm Km: -6.2 D  
 Q-val: [Data G] Axis: [42.7°] Astig: [0.2 D]  
 Q-val: [-0.16] Rper: 6.56 mm Rmin: 5.95 mm

**True Net Power**

Astig: [1.0 D] K1: [42.7 D]  
 Axis: [flt.] K2: [43.6 D]  
 P.Max: [43.9 D] Km: [43.1 D]

Thinnest Locat: [538 μm] [-0.60] [-0.60]  
 K Max (Front): [45.1 D] [+1.46] [-1.19]  
 Zonal Mean 4mm [44.4 D]

**Asphericity (Front) of Major Meridians**

| (Q-val.) | 6mm   | 7mm   | 8mm   | 9mm   | 10mm  |
|----------|-------|-------|-------|-------|-------|
| Nas      | -0.28 | -0.41 | -0.52 | -0.62 | -0.74 |
| Temp     | -0.38 | -0.41 | -0.45 | -0.49 | -0.56 |
| Inf      | -0.14 | -0.16 | -0.20 | -0.24 | -0.30 |
| Sup      | -0.21 | -0.25 | -0.29 | -0.37 | -0.52 |
| Mean     | -0.25 | -0.31 | -0.37 | -0.43 | -0.53 |

Hor.: [-0.48] Vert.: [-0.25]

**Indices (in 8mm zone)**

ISV: [14] IHA: [2.2]  
 IVA: [0.11] IHD: [0.007]  
 KI: [1.03] RMin: [7.48]  
 CKI: [1.00] TKC: [-]  
 KISA: [3.983] IS: [0.76]

**Asphericity (Front) at 8mm**

Hor.: [-0.48] Vert.: [-0.25]

**B:** B: 02/27/2013 11:31:43 Left (25) 3D-Scan HR

**Cornea Front**

Rf: 7.75 mm K1: 43.6 D  
 Rs: 7.46 mm K2: 45.2 D  
 Rm: 7.61 mm Km: 44.4 D  
 Q-val: [OK] Axis: [104.4°] Astig: [1.7 D]  
 Q-val: [-0.38] Rper: 7.90 mm Rmin: 7.41 mm

**Cornea Back**

Rf: 6.46 mm K1: -6.2 D  
 Rs: 6.25 mm K2: -6.4 D  
 Rm: 6.36 mm Km: -6.3 D  
 Q-val: [Data G] Axis: [118.6°] Astig: [0.2 D]  
 Q-val: [-0.28] Rper: 6.61 mm Rmin: 6.01 mm

**True Net Power**

Astig: [1.7 D] K1: [42.4 D]  
 Axis: [flt.] K2: [44.1 D]  
 P.Max: [44.3 D] Km: [43.2 D]

Thinnest Locat: [542 μm] [+0.84] [-0.49]  
 K Max (Front): [45.6 D] [-0.98] [-0.28]  
 Zonal Mean 4mm [44.5 D]

**Asphericity (Front) of Major Meridians**

| (Q-val.) | 6mm   | 7mm   | 8mm   | 9mm   | 10mm  |
|----------|-------|-------|-------|-------|-------|
| Nas      | -0.34 | -0.42 | -0.50 | -0.59 | -0.69 |
| Temp     | -0.34 | -0.36 | -0.40 | -0.44 | -0.49 |
| Inf      | -0.04 | -0.12 | -0.18 | -0.23 | -0.27 |
| Sup      | -0.38 | -0.42 | -0.45 | -0.46 | -0.50 |
| Mean     | -0.27 | -0.33 | -0.38 | -0.43 | -0.49 |

Hor.: [-0.45] Vert.: [-0.31]

**Indices (in 8mm zone)**

ISV: [21] IHA: [4.2]  
 IVA: [0.17] IHD: [0.011]  
 KI: [1.06] RMin: [7.41]  
 CKI: [1.00] TKC: [-]  
 KISA: [3.983] IS: [0.76]

**Asphericity (Front) at 8mm**

Hor.: [-0.45] Vert.: [-0.31]

## OCULUS - PENTACAM Belin/Ambrósio Enhanced Ectasia Display

**Corneal Thickness**

| Parameter | Value |
|-----------|-------|
| K1        | 43.90 |
| K2        | 44.50 |
| KMax      | 45.10 |
| Q1        | 66.9° |
| Q2        | 0.37  |
| Q3        | 0.37  |
| Q4        | 0.37  |
| Q5        | 0.37  |
| Q6        | 0.37  |
| Q7        | 0.37  |
| Q8        | 0.37  |
| Q9        | 0.37  |
| Q10       | 0.37  |
| Q11       | 0.37  |
| Q12       | 0.37  |
| Q13       | 0.37  |
| Q14       | 0.37  |
| Q15       | 0.37  |
| Q16       | 0.37  |
| Q17       | 0.37  |
| Q18       | 0.37  |
| Q19       | 0.37  |
| Q20       | 0.37  |
| Q21       | 0.37  |
| Q22       | 0.37  |
| Q23       | 0.37  |
| Q24       | 0.37  |
| Q25       | 0.37  |
| Q26       | 0.37  |
| Q27       | 0.37  |
| Q28       | 0.37  |
| Q29       | 0.37  |
| Q30       | 0.37  |
| Q31       | 0.37  |
| Q32       | 0.37  |
| Q33       | 0.37  |
| Q34       | 0.37  |
| Q35       | 0.37  |
| Q36       | 0.37  |
| Q37       | 0.37  |
| Q38       | 0.37  |
| Q39       | 0.37  |
| Q40       | 0.37  |
| Q41       | 0.37  |
| Q42       | 0.37  |
| Q43       | 0.37  |
| Q44       | 0.37  |
| Q45       | 0.37  |
| Q46       | 0.37  |
| Q47       | 0.37  |
| Q48       | 0.37  |
| Q49       | 0.37  |
| Q50       | 0.37  |

**Mean Corneal Thickness**

| Diameter (mm) | Mean Corneal Thickness (μm) |
|---------------|-----------------------------|
| 0             | ~538                        |
| 2             | ~538                        |
| 4             | ~538                        |
| 6             | ~538                        |
| 8             | ~538                        |
| 10            | ~538                        |

**Percentage Thickness Increase (PTI)**

| Diameter (mm) | Percentage Thickness Increase (%) |
|---------------|-----------------------------------|
| 0             | ~0                                |
| 2             | ~0                                |
| 4             | ~0                                |
| 6             | ~0                                |
| 8             | ~0                                |
| 10            | ~0                                |

## OCULUS - PENTACAM Belin/Ambrósio Enhanced Ectasia Display

**Corneal Thickness**

| Parameter | Value  |
|-----------|--------|
| K1        | 43.30  |
| K2        | 45.50  |
| KMax      | 45.10  |
| Q1        | 104.4° |
| Q2        | 0.38   |
| Q3        | 0.38   |
| Q4        | 0.38   |
| Q5        | 0.38   |
| Q6        | 0.38   |
| Q7        | 0.38   |
| Q8        | 0.38   |
| Q9        | 0.38   |
| Q10       | 0.38   |
| Q11       | 0.38   |
| Q12       | 0.38   |
| Q13       | 0.38   |
| Q14       | 0.38   |
| Q15       | 0.38   |
| Q16       | 0.38   |
| Q17       | 0.38   |
| Q18       | 0.38   |
| Q19       | 0.38   |
| Q20       | 0.38   |
| Q21       | 0.38   |
| Q22       | 0.38   |
| Q23       | 0.38   |
| Q24       | 0.38   |
| Q25       | 0.38   |
| Q26       | 0.38   |
| Q27       | 0.38   |
| Q28       | 0.38   |
| Q29       | 0.38   |
| Q30       | 0.38   |
| Q31       | 0.38   |
| Q32       | 0.38   |
| Q33       | 0.38   |
| Q34       | 0.38   |
| Q35       | 0.38   |
| Q36       | 0.38   |
| Q37       | 0.38   |
| Q38       | 0.38   |
| Q39       | 0.38   |
| Q40       | 0.38   |
| Q41       | 0.38   |
| Q42       | 0.38   |
| Q43       | 0.38   |
| Q44       | 0.38   |
| Q45       | 0.38   |
| Q46       | 0.38   |
| Q47       | 0.38   |
| Q48       | 0.38   |
| Q49       | 0.38   |
| Q50       | 0.38   |

**Mean Corneal Thickness**

| Diameter (mm) | Mean Corneal Thickness (μm) |
|---------------|-----------------------------|
| 0             | ~542                        |
| 2             | ~542                        |
| 4             | ~542                        |
| 6             | ~542                        |
| 8             | ~542                        |
| 10            | ~542                        |

**Percentage Thickness Increase (PTI)**

| Diameter (mm) | Percentage Thickness Increase (%) |
|---------------|-----------------------------------|
| 0             | ~0                                |
| 2             | ~0                                |
| 4             | ~0                                |
| 6             | ~0                                |
| 8             | ~0                                |
| 10            | ~0                                |

Patient's age, eye laterality, preoperative refraction, Pentacam Random Forest Index (PRFI) A. Pentacam topometric display of both eyes (OU). B. The Pentacam Belin / Ambrósio Enhanced Ectasia of OU. \* Eye that develops ectasia after LASIK.

# Supplementary Figure 15

| Patient 15 | Eye | Preop Rx        | PRFI  |
|------------|-----|-----------------|-------|
| 22 yo      | OD* | -2.50/-0.70x115 | 0.656 |
|            | OS* | -5.00/-1.25x160 | 0.446 |

## OCULUS - PENTACAM Show 2 Exams Topometric A 1.2205

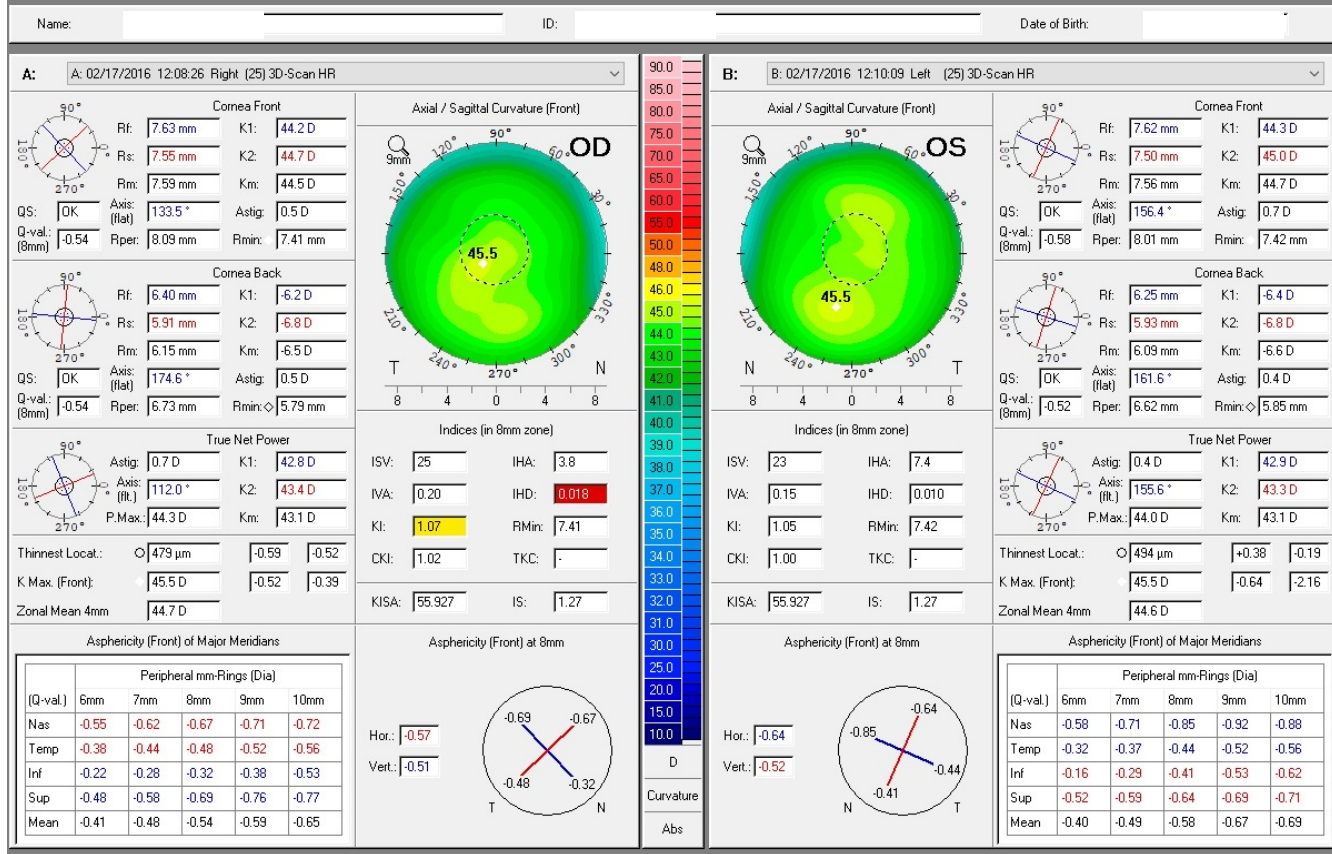

Supplement: Supplementary file 1 [file get_supplementary_file.php]
